# Supplementary material for: Communities That HEAL Intervention and Mortality Including Polysubstance Overdose Deaths: A Randomized Clinical Trial
Source: PubMed Central journal article supplement (PMC11581668; doi:10.1001/jamanetworkopen.2024.40006), 2024-10-21
Supplement: jamanetwopen-e2440006-s002.pdf [file jamanetwopen-e2440006-s002.pdf]

## Supplemental Online Content

Freisthler B, Chahine RA, Villani J, et al. Effect of the Communities That HEAL Intervention on Mortality Including Polysubstance Overdose Deaths. *JAMA Netw Open*. 2024;7(10):e2440006. doi:10.1001/jamanetworkopen.2024.40006

**eTable 1.** Descriptive Sums of Primary and Secondary Outcomes During the Baseline Period (January 2019-December 2019) Using the Intention-to-Treat Population

**eTable 2.** Descriptive Means of Primary and Secondary Outcomes During the Evaluation Period (July 1, 2021-June 30, 2022) Using the Intention-to-Treat Population

**eTable 3.** Descriptive Sums of Tertiary Outcomes During the Evaluation Period (July 1, 2021-June 30, 2022) Using the Intention-to-Treat Population

**eTable 4.** Calculation of Proportions of Opioid Deaths Involving Specific Drugs

**eTable 5.** Adjusted Rate of Each Outcome Within Trial Groups and Adjusted Relative Rate of Each Outcome Between Intervention to Control Communities During the Evaluation Period Using the Per-Protocol Population

**eTable 6.** Sensitivity Analyses

This supplemental material has been provided by the authors to give readers additional information about their work.

**eTable 1. Descriptive Sums of Primary and Secondary Outcomes During the Baseline Period (January 2019 – December 2019) Using the Intention-to-Treat Population**

| Outcome              | Group                      | Intervention Communities  |                               |                               | Control Communities       |                               |                               | Overall Rate Ratio <sup>3</sup> |
|----------------------|----------------------------|---------------------------|-------------------------------|-------------------------------|---------------------------|-------------------------------|-------------------------------|---------------------------------|
|                      |                            | Total Events <sup>1</sup> | Total Population <sup>1</sup> | Overall Raw Rate <sup>2</sup> | Total Events <sup>1</sup> | Total Population <sup>1</sup> | Overall Raw Rate <sup>2</sup> |                                 |
| Drug Overdose Deaths | Overall                    | 2,086                     | 4,439,170                     | 47.0                          | 1,803                     | 3,772,336                     | 47.8                          | 0.98                            |
|                      | Research Site              |                           |                               |                               |                           |                               |                               |                                 |
|                      | Kentucky                   | 313 (15.0%)               | 617,841 (13.9%)               | 50.7                          | 425 (23.6%)               | 815,764 (21.6%)               | 52.1                          | 0.97                            |
|                      | Massachusetts              | 182 (8.7%)                | 359,314 (8.1%)                | 50.7                          | 231 (12.8%)               | 356,545 (9.5%)                | 64.8                          | 0.78                            |
|                      | New York                   | 311 (14.9%)               | 1,101,497 (24.8%)             | 28.2                          | 373 (20.7%)               | 976,069 (25.9%)               | 38.2                          | 0.74                            |
|                      | Ohio                       | 1,280 (61.4%)             | 2,360,518 (53.2%)             | 54.2                          | 774 (42.9%)               | 1,623,958 (43.0%)             | 47.7                          | 1.14                            |
|                      | Urban/Rural Classification |                           |                               |                               |                           |                               |                               |                                 |
|                      | Urban                      | 1,803 (86.4%)             | 3,793,353 (85.5%)             | 47.5                          | 1,595 (88.5%)             | 3,242,663 (86.0%)             | 49.2                          | 0.97                            |
|                      | Rural                      | 283 (13.6%)               | 645,817 (14.5%)               | 43.8                          | 208 (11.5%)               | 529,673 (14.0%)               | 39.3                          | 1.12                            |
|                      | Age                        |                           |                               |                               |                           |                               |                               |                                 |
|                      | 18-34 Years                | 597 (28.6%)               | 1,334,880 (30.1%)             | 44.7                          | 565 (31.3%)               | 1,178,210 (31.2%)             | 48.0                          | 0.93                            |
|                      | 35-54 Years                | 980 (47.0%)               | 1,353,341 (30.5%)             | 72.4                          | 869 (48.2%)               | 1,180,392 (31.3%)             | 73.6                          | 0.98                            |
|                      | 55+ Years                  | 509 (24.4%)               | 1,750,949 (39.4%)             | 29.1                          | 369 (20.5%)               | 1,413,734 (37.5%)             | 26.1                          | 1.11                            |
|                      | Sex                        |                           |                               |                               |                           |                               |                               |                                 |
|                      | Male                       | 1,431 (68.6%)             | 2,133,827 (48.1%)             | 67.1                          | 1,218 (67.6%)             | 1,825,776 (48.4%)             | 66.7                          | 1.01                            |
|                      | Female                     | 655 (31.4%)               | 2,305,343 (51.9%)             | 28.4                          | 585 (32.4%)               | 1,946,560 (51.6%)             | 30.1                          | 0.95                            |
|                      | Missing                    | 0 (0.0%)                  | NA                            | NA                            | 0 (0.0%)                  | NA                            | NA                            | NA                              |
| Race/Ethnicity       |                            |                           |                               |                               |                           |                               |                               |                                 |
| Non-Hispanic White   | 1,591 (76.3%)              | 3,229,233 (72.7%)         | 49.3                          | 1,301 (72.2%)                 | 2,750,369 (72.9%)         | 47.3                          | 1.04                          |                                 |
| Non-Hispanic Black   | 349 (16.7%)                | 728,037 (16.4%)           | 47.9                          | 331 (18.4%)                   | 545,357 (14.5%)           | 60.7                          | 0.79                          |                                 |

|                                                                                          |                                   |             |                   |      |             |                   |      |      |
|------------------------------------------------------------------------------------------|-----------------------------------|-------------|-------------------|------|-------------|-------------------|------|------|
|                                                                                          | Non-Hispanic Other                | 16 (0.8%)   | 200,571 (4.5%)    | 8.0  | 25 (1.4%)   | 153,956 (4.1%)    | 16.2 | 0.49 |
|                                                                                          | Hispanic                          | 127 (6.1%)  | 281,329 (6.3%)    | 45.1 | 144 (8.0%)  | 322,654 (8.6%)    | 44.6 | 1.01 |
|                                                                                          | Missing                           | 3 (0.1%)    | NA                | NA   | 2 (0.1%)    | NA                | NA   | NA   |
| <b>Overdose Deaths Involving any Opioid and any Psychostimulant (Other than Cocaine)</b> | <b>Overall</b>                    | 240         | 4,439,170         | 5.4  | 235         | 3,772,336         | 6.2  | 0.87 |
|                                                                                          | <b>Research Site</b>              |             |                   |      |             |                   |      |      |
|                                                                                          | Kentucky                          | 63 (26.3%)  | 617,841 (13.9%)   | 10.2 | 105 (44.7%) | 815,764 (21.6%)   | 12.9 | 0.79 |
|                                                                                          | Massachusetts                     | 8 (3.3%)    | 359,314 (8.1%)    | 2.2  | 2 (0.9%)    | 356,545 (9.5%)    | 0.6  | 3.97 |
|                                                                                          | New York                          | 12 (5.0%)   | 1,101,497 (24.8%) | 1.1  | 24 (10.2%)  | 976,069 (25.9%)   | 2.5  | 0.44 |
|                                                                                          | Ohio                              | 157 (65.4%) | 2,360,518 (53.2%) | 6.7  | 104 (44.3%) | 1,623,958 (43.0%) | 6.4  | 1.04 |
|                                                                                          | <b>Urban/Rural Classification</b> |             |                   |      |             |                   |      |      |
|                                                                                          | Urban                             | 178 (74.2%) | 3,793,353 (85.5%) | 4.7  | 212 (90.2%) | 3,242,663 (86.0%) | 6.5  | 0.72 |
|                                                                                          | Rural                             | 62 (25.8%)  | 645,817 (14.5%)   | 9.6  | 23 (9.8%)   | 529,673 (14.0%)   | 4.3  | 2.21 |
| <b>Overdose Deaths Involving any Opioid and Cocaine</b>                                  | <b>Overall</b>                    | 519         | 4,439,170         | 11.7 | 461         | 3,772,336         | 12.2 | 0.96 |
|                                                                                          | <b>Research Site</b>              |             |                   |      |             |                   |      |      |
|                                                                                          | Kentucky                          | 28 (5.4%)   | 617,841 (13.9%)   | 4.5  | 33 (7.2%)   | 815,764 (21.6%)   | 4.0  | 1.12 |
|                                                                                          | Massachusetts                     | 59 (11.4%)  | 359,314 (8.1%)    | 16.4 | 83 (18.0%)  | 356,545 (9.5%)    | 23.3 | 0.71 |
|                                                                                          | New York                          | 99 (19.1%)  | 1,101,497 (24.8%) | 9.0  | 113 (24.5%) | 976,069 (25.9%)   | 11.6 | 0.78 |
|                                                                                          | Ohio                              | 333 (64.2%) | 2,360,518 (53.2%) | 14.1 | 232 (50.3%) | 1,623,958 (43.0%) | 14.3 | 0.99 |
|                                                                                          | <b>Urban/Rural Classification</b> |             |                   |      |             |                   |      |      |
|                                                                                          | Urban                             | 495 (95.4%) | 3,793,353 (85.5%) | 13.0 | 425 (92.2%) | 3,242,663 (86.0%) | 13.1 | 1.00 |
|                                                                                          | Rural                             | 24 (4.6%)   | 645,817 (14.5%)   | 3.7  | 36 (7.8%)   | 529,673 (14.0%)   | 6.8  | 0.55 |
| <b>Overdose Deaths Involving any Opioid and any Benzodiazepine</b>                       | <b>Overall</b>                    | 272         | 4,439,170         | 6.1  | 228         | 3,772,336         | 6.0  | 1.01 |
|                                                                                          | <b>Research Site</b>              |             |                   |      |             |                   |      |      |
|                                                                                          | Kentucky                          | 37 (13.6%)  | 617,841 (13.9%)   | 6.0  | 72 (31.6%)  | 815,764 (21.6%)   | 8.8  | 0.68 |
|                                                                                          | Massachusetts                     | 49 (18.0%)  | 359,314 (8.1%)    | 13.6 | 44 (19.3%)  | 356,545 (9.5%)    | 12.3 | 1.11 |

|                                                                                                                                                                                       |                                       |             |                      |     |             |                   |     |      |
|---------------------------------------------------------------------------------------------------------------------------------------------------------------------------------------|---------------------------------------|-------------|----------------------|-----|-------------|-------------------|-----|------|
|                                                                                                                                                                                       | New York                              | 73 (26.8%)  | 1,101,497<br>(24.8%) | 6.6 | 57 (25.0%)  | 976,069 (25.9%)   | 5.8 | 1.13 |
|                                                                                                                                                                                       | Ohio                                  | 113 (41.5%) | 2,360,518<br>(53.2%) | 4.8 | 55 (24.1%)  | 1,623,958 (43.0%) | 3.4 | 1.41 |
|                                                                                                                                                                                       | <b>Urban/Rural<br/>Classification</b> |             |                      |     |             |                   |     |      |
|                                                                                                                                                                                       | Urban                                 | 242 (89.0%) | 3,793,353<br>(85.5%) | 6.4 | 191 (83.8%) | 3,242,663 (86.0%) | 5.9 | 1.08 |
|                                                                                                                                                                                       | Rural                                 | 30 (11.0%)  | 645,817 (14.5%)      | 4.6 | 37 (16.2%)  | 529,673 (14.0%)   | 7.0 | 0.66 |
| <sup>1</sup> Sum of all events/ population in that group and trial group.                                                                                                             |                                       |             |                      |     |             |                   |     |      |
| <sup>2</sup> Raw rate calculated as 100,000 multiplied by the sum of all events in that group and trial groupwave divided by the sum of the population in that group and trial group. |                                       |             |                      |     |             |                   |     |      |
| <sup>3</sup> Overall rate ratio calculated as the overall raw rate in Intervention Communities divided by the overall raw rate in Control Communities.                                |                                       |             |                      |     |             |                   |     |      |

eTable 2. Descriptive Means of Primary and Secondary Outcomes During the Evaluation Period (July 1, 2021 - June 30, 2022) Using the Intention-to-Treat Population

| Outcome              | Group                             | Intervention Communities |                          |                       | Control Communities |                         |                       | Overall Rate Ratio <sup>3</sup> |
|----------------------|-----------------------------------|--------------------------|--------------------------|-----------------------|---------------------|-------------------------|-----------------------|---------------------------------|
|                      |                                   | Events <sup>1</sup>      | Population <sup>1</sup>  | Raw Rate <sup>2</sup> | Events <sup>1</sup> | Population <sup>1</sup> | Raw Rate <sup>2</sup> |                                 |
| Drug Overdose Deaths | Overall                           | 75.9<br>(115.6)          | 130,563.8<br>(200,088.0) | 57.6 (30.3)           | 80.0 (161.3)        | 114,313.2 (201,417.3)   | 61.2 (24.5)           | 0.94                            |
|                      | <b>Research Site</b>              |                          |                          |                       |                     |                         |                       |                                 |
|                      | Kentucky                          | 56.3 (49.2)              | 77,230.1 (80,938.9)      | 81.7 (25.9)           | 84.1 (185.3)        | 101,970.5 (202,045.3)   | 68.2 (24.2)           | 1.20                            |
|                      | Massachusetts                     | 28.0 (24.8)              | 44,914.3 (26,559.3)      | 54.1 (29.3)           | 33.1 (28.0)         | 44,568.1 (33,628.8)     | 71.3 (24.5)           | 0.76                            |
|                      | New York                          | 67.9 (84.1)              | 137,687.1<br>(140,779.9) | 38.5 (17.4)           | 76.6 (83.6)         | 122,008.6 (106,012.1)   | 52.2 (25.3)           | 0.74                            |
|                      | Ohio                              | 136.5<br>(186.0)         | 236,051.8<br>(322,922.0) | 56.5 (32.8)           | 121.0<br>(251.2)    | 180,439.8 (325,173.2)   | 54.0 (22.7)           | 1.05                            |
|                      | <b>Urban/Rural Classification</b> |                          |                          |                       |                     |                         |                       |                                 |
|                      | Urban                             | 115.9<br>(142.5)         | 199,650.2<br>(248,385.2) | 59.5 (22.5)           | 122.7<br>(203.8)    | 170,666.5 (252,614.9)   | 63.5 (23.3)           | 0.94                            |
|                      | Rural                             | 25.3 (21.4)              | 43,054.5 (19,075.4)      | 55.3 (38.7)           | 22.1 (16.3)         | 37,833.8 (23,733.0)     | 58.1 (26.7)           | 0.95                            |
|                      | <b>Age</b>                        |                          |                          |                       |                     |                         |                       |                                 |
|                      | 18-34 Years                       | 19.3 (27.5)              | 39,261.2 (60,440.2)      | 51.1 (26.0)           | 21.3 (45.0)         | 35,703.3 (69,802.6)     | 58.8 (28.7)           | 0.87                            |
|                      | 35-54 Years                       | 37.1 (56.9)              | 39,804.1 (60,321.8)      | 92.8 (58.4)           | 38.5 (78.2)         | 35,769.5 (65,163.6)     | 96.1 (40.8)           | 0.97                            |
|                      | 55+ Years                         | 19.6 (32.5)              | 51,498.5 (79,908.4)      | 37.2 (21.3)           | 20.1 (39.3)         | 42,840.4 (67,485.8)     | 37.5 (25.7)           | 0.99                            |
|                      | <b>Sex</b>                        |                          |                          |                       |                     |                         |                       |                                 |
|                      | Male                              | 52.1 (79.3)              | 62,759.6 (94,370.9)      | 80.5 (46.7)           | 55.1 (109.3)        | 55,326.5 (96,853.5)     | 87.6 (37.8)           | 0.92                            |
|                      | Female                            | 23.8 (36.6)              | 67,804.2<br>(105,743.9)  | 36.5 (20.1)           | 24.9 (52.2)         | 58,986.7 (104,579.4)    | 36.2 (19.0)           | 1.01                            |
|                      | <b>Race/Ethnicity</b>             |                          |                          |                       |                     |                         |                       |                                 |
|                      | Non-Hispanic White                | 53.7 (70.5)              | 94,977.4<br>(128,763.1)  | 59.1 (33.3)           | 53.8 (102.1)        | 83,344.5 (135,601.7)    | 60.1 (26.5)           | 0.98                            |
|                      | Non-Hispanic Black                | 16.4 (38.7)              | 21,412.9 (55,089.6)      | 101.8 (146.2)         | 18.8 (52.8)         | 16,526.0 (45,296.8)     | 156.0<br>(228.4)      | 0.65                            |
|                      | Non-Hispanic Other                | 1.1 (2.5)                | 5,899.1 (9,757.0)        | 14.9 (50.9)           | 1.3 (3.2)           | 4,665.3 (11,990.9)      | 30.6 (110.7)          | 0.49                            |
| Hispanic             | 4.5 (9.0)                         | 8,274.4 (13,482.1)       | 27.3 (39.7)              | 5.8 (11.2)            | 9,777.4 (17,743.5)  | 54.5 (82.9)             | 0.50                  |                                 |
| Missing              | 0.3 (0.8)                         | NA                       | NA                       | 0.4 (1.0)             | NA                  | NA                      | NA                    |                                 |

|                                                                                          |                                   |             |                          |             |             |                       |             |      |
|------------------------------------------------------------------------------------------|-----------------------------------|-------------|--------------------------|-------------|-------------|-----------------------|-------------|------|
| <b>Overdose Deaths Involving any Opioid and any Psychostimulant (Other than Cocaine)</b> | <b>Overall</b>                    | 11.6 (17.4) | 130,563.8<br>(200,088.0) | 11.1 (14.3) | 16.2 (40.4) | 114,313.2 (201,417.3) | 13.0 (12.8) | 0.86 |
|                                                                                          | <b>Research Site</b>              |             |                          |             |             |                       |             |      |
|                                                                                          | Kentucky                          | 16.3 (13.6) | 77,230.1 (80,938.9)      | 24.0 (13.6) | 33.1 (73.6) | 101,970.5 (202,045.3) | 26.8 (11.3) | 0.90 |
|                                                                                          | Massachusetts                     | 1.1 (2.1)   | 44,914.3 (26,559.3)      | 1.4 (2.6)   | 1.1 (1.2)   | 44,568.1 (33,628.8)   | 2.4 (2.6)   | 0.56 |
|                                                                                          | New York                          | 5.1 (7.0)   | 137,687.1<br>(140,779.9) | 3.1 (1.8)   | 10.1 (12.3) | 122,008.6 (106,012.1) | 9.5 (8.3)   | 0.33 |
|                                                                                          | Ohio                              | 21.6 (25.6) | 236,051.8<br>(322,922.0) | 14.9 (17.1) | 19.8 (33.1) | 180,439.8 (325,173.2) | 13.1 (12.7) | 1.13 |
|                                                                                          | <b>Urban/Rural Classification</b> |             |                          |             |             |                       |             |      |
|                                                                                          | Urban                             | 15.1 (21.2) | 199,650.2<br>(248,385.2) | 7.9 (10.8)  | 23.8 (52.2) | 170,666.5 (252,614.9) | 11.8 (11.9) | 0.67 |
|                                                                                          | Rural                             | 7.3 (10.0)  | 43,054.5 (19,075.4)      | 15.1 (17.3) | 5.8 (6.9)   | 37,833.8 (23,733.0)   | 14.5 (14.2) | 1.04 |
| <b>Overdose Deaths Involving any Opioid and Cocaine</b>                                  | <b>Overall</b>                    | 21.9 (41.0) | 130,563.8<br>(200,088.0) | 11.5 (10.8) | 23.8 (56.5) | 114,313.2 (201,417.3) | 14.9 (16.1) | 0.77 |
|                                                                                          | <b>Research Site</b>              |             |                          |             |             |                       |             |      |
|                                                                                          | Kentucky                          | 7.1 (11.5)  | 77,230.1 (80,938.9)      | 6.2 (5.0)   | 12.0 (30.7) | 101,970.5 (202,045.3) | 5.3 (4.8)   | 1.17 |
|                                                                                          | Massachusetts                     | 11.6 (14.3) | 44,914.3 (26,559.3)      | 19.4 (15.9) | 13.5 (12.9) | 44,568.1 (33,628.8)   | 28.0 (21.0) | 0.69 |
|                                                                                          | New York                          | 26.5 (39.4) | 137,687.1<br>(140,779.9) | 11.8 (9.9)  | 29.5 (50.3) | 122,008.6 (106,012.1) | 17.8 (16.6) | 0.66 |
|                                                                                          | Ohio                              | 38.4 (64.0) | 236,051.8<br>(322,922.0) | 9.4 (7.0)   | 38.3 (95.2) | 180,439.8 (325,173.2) | 9.2 (9.0)   | 1.02 |
|                                                                                          | <b>Urban/Rural Classification</b> |             |                          |             |             |                       |             |      |
|                                                                                          | Urban                             | 37.3 (50.2) | 199,650.2<br>(248,385.2) | 16.4 (11.8) | 38.1 (71.7) | 170,666.5 (252,614.9) | 19.4 (18.5) | 0.85 |
|                                                                                          | Rural                             | 2.5 (2.3)   | 43,054.5 (19,075.4)      | 5.4 (4.6)   | 4.4 (5.2)   | 37,833.8 (23,733.0)   | 8.8 (9.8)   | 0.61 |
| <b>Overdose Deaths Involving any Opioid and any Benzodiazepine</b>                       | <b>Overall</b>                    | 8.6 (13.9)  | 130,563.8<br>(200,088.0) | 6.9 (5.6)   | 8.2 (15.6)  | 114,313.2 (201,417.3) | 6.9 (6.0)   | 1.01 |
|                                                                                          | <b>Research Site</b>              |             |                          |             |             |                       |             |      |
|                                                                                          | Kentucky                          | 5.6 (4.1)   | 77,230.1 (80,938.9)      | 9.6 (7.3)   | 11.3 (24.2) | 101,970.5 (202,045.3) | 10.1 (8.4)  | 0.95 |
|                                                                                          | Massachusetts                     | 5.5 (5.7)   | 44,914.3 (26,559.3)      | 9.9 (5.6)   | 3.0 (2.6)   | 44,568.1 (33,628.8)   | 7.8 (6.0)   | 1.28 |
|                                                                                          | New York                          | 10.8 (14.4) | 137,687.1<br>(140,779.9) | 5.4 (3.7)   | 8.9 (11.9)  | 122,008.6 (106,012.1) | 6.1 (4.3)   | 0.89 |

|                                                                                                                                                             |                                       |             |                          |           |             |                       |           |      |
|-------------------------------------------------------------------------------------------------------------------------------------------------------------|---------------------------------------|-------------|--------------------------|-----------|-------------|-----------------------|-----------|------|
|                                                                                                                                                             | Ohio                                  | 11.6 (21.8) | 236,051.8<br>(322,922.0) | 3.7 (3.3) | 9.7 (16.9)  | 180,439.8 (325,173.2) | 4.0 (3.7) | 0.92 |
|                                                                                                                                                             | <b>Urban/Rural<br/>Classification</b> |             |                          |           |             |                       |           |      |
|                                                                                                                                                             | Urban                                 | 13.7 (17.0) | 199,650.2<br>(248,385.2) | 8.0 (5.8) | 12.2 (19.7) | 170,666.5 (252,614.9) | 6.6 (5.1) | 1.21 |
|                                                                                                                                                             | Rural                                 | 2.1 (1.8)   | 43,054.5 (19,075.4)      | 5.6 (5.3) | 2.9 (2.8)   | 37,833.8 (23,733.0)   | 7.3 (7.3) | 0.77 |
| <sup>1</sup> Mean (Standard Deviation) of the community-level events or population in that group and trial group.                                           |                                       |             |                          |           |             |                       |           |      |
| <sup>2</sup> Mean (Standard Deviation) of the community-level rates expressed per 100,000 residents 18 years of age or older in that group and trial group. |                                       |             |                          |           |             |                       |           |      |
| <sup>3</sup> Overall rate ratio calculated as the raw rate in Intervention Communities divided by the raw rate in Control Communities.                      |                                       |             |                          |           |             |                       |           |      |

eTable 3. Descriptive Sums of Tertiary Outcomes During the Evaluation Period (July 1, 2021 - June 30, 2022) Using the Intention-to-Treat Population

| Outcome                                                      | Group                      | Intervention Communities  |                               |                               | Control Communities       |                               |                               | Overall Rate Ratio <sup>3</sup> |
|--------------------------------------------------------------|----------------------------|---------------------------|-------------------------------|-------------------------------|---------------------------|-------------------------------|-------------------------------|---------------------------------|
|                                                              |                            | Total Events <sup>1</sup> | Total Population <sup>1</sup> | Overall Raw Rate <sup>2</sup> | Total Events <sup>1</sup> | Total Population <sup>1</sup> | Overall Raw Rate <sup>2</sup> |                                 |
| Opioid Overdose Deaths Involving Heroin                      | Overall                    | 93                        | 4,439,170                     | 2.1                           | 125                       | 3,772,336                     | 3.3                           | 0.63                            |
|                                                              | Research Site              |                           |                               |                               |                           |                               |                               |                                 |
|                                                              | Kentucky                   | 10 (10.8%)                | 617,841 (13.9%)               | 1.6                           | 19 (15.2%)                | 815,764 (21.6%)               | 2.3                           | 0.69                            |
|                                                              | Massachusetts              | 13 (14.0%)                | 359,314 (8.1%)                | 3.6                           | 43 (34.4%)                | 356,545 (9.5%)                | 12.1                          | 0.30                            |
|                                                              | New York                   | 28 (30.1%)                | 1,101,497 (24.8%)             | 2.5                           | 54 (43.2%)                | 976,069 (25.9%)               | 5.5                           | 0.46                            |
|                                                              | Ohio                       | 42 (45.2%)                | 2,360,518 (53.2%)             | 1.8                           | 9 (7.2%)                  | 1,623,958 (43.0%)             | 0.6                           | 3.21                            |
|                                                              | Urban/Rural Classification |                           |                               |                               |                           |                               |                               |                                 |
|                                                              | Urban                      | 75 (80.6%)                | 3,793,353 (85.5%)             | 2.0                           | 94 (75.2%)                | 3,242,663 (86.0%)             | 2.9                           | 0.68                            |
| Rural                                                        | 18 (19.4%)                 | 645,817 (14.5%)           | 2.8                           | 31 (24.8%)                    | 529,673 (14.0%)           | 5.9                           | 0.48                          |                                 |
| Overdose Deaths Involving Synthetic Opioids Except Methadone | Overall                    | 2,075                     | 4,439,170                     | 46.7                          | 2,165                     | 3,772,336                     | 57.4                          | 0.81                            |
|                                                              | Research Site              |                           |                               |                               |                           |                               |                               |                                 |
|                                                              | Kentucky                   | 350 (16.9%)               | 617,841 (13.9%)               | 56.6                          | 571 (26.4%)               | 815,764 (21.6%)               | 70.0                          | 0.81                            |
|                                                              | Massachusetts              | 193 (9.3%)                | 359,314 (8.1%)                | 53.7                          | 232 (10.7%)               | 356,545 (9.5%)                | 65.1                          | 0.83                            |
|                                                              | New York                   | 433 (20.9%)               | 1,101,497 (24.8%)             | 39.3                          | 507 (23.4%)               | 976,069 (25.9%)               | 51.9                          | 0.76                            |
|                                                              | Ohio                       | 1,099 (53.0%)             | 2,360,518 (53.2%)             | 46.6                          | 855 (39.5%)               | 1,623,958 (43.0%)             | 52.6                          | 0.88                            |
|                                                              | Urban/Rural Classification |                           |                               |                               |                           |                               |                               |                                 |
|                                                              | Urban                      | 1,799 (86.7%)             | 3,793,353 (85.5%)             | 47.4                          | 1,912 (88.3%)             | 3,242,663 (86.0%)             | 59.0                          | 0.80                            |
| Rural                                                        | 276 (13.3%)                | 645,817 (14.5%)           | 42.7                          | 253 (11.7%)                   | 529,673 (14.0%)           | 47.8                          | 0.89                          |                                 |
| Overdose Deaths Involving Any                                | Overall                    | 1,059                     | 4,439,170                     | 23.9                          | 1,218                     | 3,772,336                     | 32.3                          | 0.74                            |
|                                                              | Research Site              |                           |                               |                               |                           |                               |                               |                                 |

|                                                                           |                                   |                 |                   |            |                 |                   |      |      |
|---------------------------------------------------------------------------|-----------------------------------|-----------------|-------------------|------------|-----------------|-------------------|------|------|
| <b>Opioid and Any Psychostimulant (Including Cocaine)</b>                 | Kentucky                          | 176 (16.6%)     | 617,841 (13.9%)   | 28.5       | 324 (26.6%)     | 815,764 (21.6%)   | 39.7 | 0.72 |
|                                                                           | Massachusetts                     | 97 (9.2%)       | 359,314 (8.1%)    | 27.0       | 114 (9.4%)      | 356,545 (9.5%)    | 32.0 | 0.84 |
|                                                                           | New York                          | 237 (22.4%)     | 1,101,497 (24.8%) | 21.5       | 301 (24.7%)     | 976,069 (25.9%)   | 30.8 | 0.70 |
|                                                                           | Ohio                              | 549 (51.8%)     | 2,360,518 (53.2%) | 23.3       | 479 (39.3%)     | 1,623,958 (43.0%) | 29.5 | 0.79 |
|                                                                           | <b>Urban/Rural Classification</b> |                 |                   |            |                 |                   |      |      |
|                                                                           | Urban                             | 917 (86.6%)     | 3,793,353 (85.5%) | 24.2       | 1,085 (89.1%)   | 3,242,663 (86.0%) | 33.5 | 0.72 |
|                                                                           | Rural                             | 142 (13.4%)     | 645,817 (14.5%)   | 22.0       | 133 (10.9%)     | 529,673 (14.0%)   | 25.1 | 0.88 |
| <b>Overdose Deaths Involving Any Psychostimulant (Other than Cocaine)</b> | <b>Overall</b>                    | 482             | 4,439,170         | 10.9       | 638             | 3,772,336         | 16.9 | 0.64 |
|                                                                           | <b>Research Site</b>              |                 |                   |            |                 |                   |      |      |
|                                                                           | Kentucky                          | 155 (32.2%)     | 617,841 (13.9%)   | 25.1       | 303 (47.5%)     | 815,764 (21.6%)   | 37.1 | 0.68 |
|                                                                           | Massachusetts                     | 14 (2.9%)       | 359,314 (8.1%)    | 3.9        | 12 (1.9%)       | 356,545 (9.5%)    | 3.4  | 1.16 |
|                                                                           | New York                          | 52 (10.8%)      | 1,101,497 (24.8%) | 4.7        | 97 (15.2%)      | 976,069 (25.9%)   | 9.9  | 0.48 |
|                                                                           | Ohio                              | 261 (54.1%)     | 2,360,518 (53.2%) | 11.1       | 226 (35.4%)     | 1,623,958 (43.0%) | 13.9 | 0.79 |
|                                                                           | <b>Urban/Rural Classification</b> |                 |                   |            |                 |                   |      |      |
|                                                                           | Urban                             | 347 (72.0%)     | 3,793,353 (85.5%) | 9.1        | 545 (85.4%)     | 3,242,663 (86.0%) | 16.8 | 0.54 |
| Rural                                                                     | 135 (28.0%)                       | 645,817 (14.5%) | 20.9              | 93 (14.6%) | 529,673 (14.0%) | 17.6              | 1.19 |      |
| <b>Overdose Deaths Involving Cocaine</b>                                  | <b>Overall</b>                    | 891             | 4,439,170         | 20.1       | 924             | 3,772,336         | 24.5 | 0.82 |
|                                                                           | <b>Research Site</b>              |                 |                   |            |                 |                   |      |      |
|                                                                           | Kentucky                          | 65 (7.3%)       | 617,841 (13.9%)   | 10.5       | 105 (11.4%)     | 815,764 (21.6%)   | 12.9 | 0.82 |
|                                                                           | Massachusetts                     | 105 (11.8%)     | 359,314 (8.1%)    | 29.2       | 122 (13.2%)     | 356,545 (9.5%)    | 34.2 | 0.85 |
|                                                                           | New York                          | 250 (28.1%)     | 1,101,497 (24.8%) | 22.7       | 267 (28.9%)     | 976,069 (25.9%)   | 27.4 | 0.83 |
|                                                                           | Ohio                              | 471 (52.9%)     | 2,360,518 (53.2%) | 20.0       | 430 (46.5%)     | 1,623,958 (43.0%) | 26.5 | 0.75 |

|                                                                           |                                   |               |                   |      |               |                   |      |      |
|---------------------------------------------------------------------------|-----------------------------------|---------------|-------------------|------|---------------|-------------------|------|------|
|                                                                           | <b>Urban/Rural Classification</b> |               |                   |      |               |                   |      |      |
|                                                                           | Urban                             | 845 (94.8%)   | 3,793,353 (85.5%) | 22.3 | 853 (92.3%)   | 3,242,663 (86.0%) | 26.3 | 0.85 |
|                                                                           | Rural                             | 46 (5.2%)     | 645,817 (14.5%)   | 7.1  | 71 (7.7%)     | 529,673 (14.0%)   | 13.4 | 0.53 |
| <b>Overdose Deaths Involving Any Psychostimulant (Including Cocaine)</b>  | <b>Overall</b>                    | 1,277         | 4,439,170         | 28.8 | 1,449         | 3,772,336         | 38.4 | 0.75 |
|                                                                           | <b>Research Site</b>              |               |                   |      |               |                   |      |      |
|                                                                           | Kentucky                          | 207 (16.2%)   | 617,841 (13.9%)   | 33.5 | 370 (25.5%)   | 815,764 (21.6%)   | 45.4 | 0.74 |
|                                                                           | Massachusetts                     | 113 (8.8%)    | 359,314 (8.1%)    | 31.4 | 131 (9.0%)    | 356,545 (9.5%)    | 36.7 | 0.86 |
|                                                                           | New York                          | 284 (22.2%)   | 1,101,497 (24.8%) | 25.8 | 346 (23.9%)   | 976,069 (25.9%)   | 35.4 | 0.73 |
|                                                                           | Ohio                              | 673 (52.7%)   | 2,360,518 (53.2%) | 28.5 | 602 (41.5%)   | 1,623,958 (43.0%) | 37.1 | 0.77 |
|                                                                           | <b>Urban/Rural Classification</b> |               |                   |      |               |                   |      |      |
|                                                                           | Urban                             | 1,102 (86.3%) | 3,793,353 (85.5%) | 29.1 | 1,294 (89.3%) | 3,242,663 (86.0%) | 39.9 | 0.73 |
|                                                                           | Rural                             | 175 (13.7%)   | 645,817 (14.5%)   | 27.1 | 155 (10.7%)   | 529,673 (14.0%)   | 29.3 | 0.93 |
| <b>Overdose Deaths Involving Benzodiazepine</b>                           | <b>Overall</b>                    | 317           | 4,439,170         | 7.1  | 304           | 3,772,336         | 8.1  | 0.89 |
|                                                                           | <b>Research Site</b>              |               |                   |      |               |                   |      |      |
|                                                                           | Kentucky                          | 52 (16.4%)    | 617,841 (13.9%)   | 8.4  | 100 (32.9%)   | 815,764 (21.6%)   | 12.3 | 0.69 |
|                                                                           | Massachusetts                     | 46 (14.5%)    | 359,314 (8.1%)    | 12.8 | 28 (9.2%)     | 356,545 (9.5%)    | 7.9  | 1.63 |
|                                                                           | New York                          | 92 (29.0%)    | 1,101,497 (24.8%) | 8.4  | 76 (25.0%)    | 976,069 (25.9%)   | 7.8  | 1.07 |
|                                                                           | Ohio                              | 127 (40.1%)   | 2,360,518 (53.2%) | 5.4  | 100 (32.9%)   | 1,623,958 (43.0%) | 6.2  | 0.87 |
|                                                                           | <b>Urban/Rural Classification</b> |               |                   |      |               |                   |      |      |
|                                                                           | Urban                             | 282 (89.0%)   | 3,793,353 (85.5%) | 7.4  | 257 (84.5%)   | 3,242,663 (86.0%) | 7.9  | 0.94 |
|                                                                           | Rural                             | 35 (11.0%)    | 645,817 (14.5%)   | 5.4  | 47 (15.5%)    | 529,673 (14.0%)   | 8.9  | 0.61 |
| <sup>1</sup> Sum of all events/ population in that group and trial group. |                                   |               |                   |      |               |                   |      |      |

<sup>2</sup>Raw rate calculated as 100,000 multiplied by the sum of all events in that group and trial groupwave divided by the sum of the population in that group and trial group.

<sup>3</sup>Overall rate ratio calculated as the overall raw rate in Intervention Communities divided by the overall raw rate in Control Communities.

**eTable 4. Calculation of Proportions of Opioid Deaths Involving Specific Drugs**

| First Outcome                                                                                                          | Second Outcome                                                                   | Intervention Communities                   |                                             |                         | Control Communities                        |                                             |                         |
|------------------------------------------------------------------------------------------------------------------------|----------------------------------------------------------------------------------|--------------------------------------------|---------------------------------------------|-------------------------|--------------------------------------------|---------------------------------------------|-------------------------|
|                                                                                                                        |                                                                                  | Total Events in First Outcome <sup>1</sup> | Total Events in Second Outcome <sup>1</sup> | Proportion <sup>2</sup> | Total Events in First Outcome <sup>1</sup> | Total Events in Second Outcome <sup>1</sup> | Proportion <sup>2</sup> |
| Number of Opioid Overdose Deaths Involving Synthetic Opioids Except Methadone                                          | Number of Opioid Overdose Deaths <sup>3</sup>                                    | 2,075                                      | 2,220                                       | 0.93                    | 2,165                                      | 2,297                                       | 0.94                    |
| Number of Opioid Overdose Deaths Involving Heroin                                                                      | Number of Opioid Overdose Deaths <sup>3</sup>                                    | 93                                         | 2,220                                       | 0.04                    | 125                                        | 2,297                                       | 0.05                    |
| Number of Opioid Overdose Deaths Involving Any Opioid and Any Psychostimulant (Including Cocaine)                      | Number of Opioid Overdose Deaths <sup>3</sup>                                    | 1,059                                      | 2,220                                       | 0.48                    | 1,218                                      | 2,297                                       | 0.53                    |
| Number of Opioid Overdose Deaths Involving Any Opioid and Any Psychostimulant (Including Cocaine)                      | Number of Drug Overdose Deaths Involving Any Psychostimulant (Including Cocaine) | 1,059                                      | 1,277                                       | 0.83                    | 1,218                                      | 1,449                                       | 0.84                    |
| <sup>1</sup> Sum of events in that trial group.                                                                        |                                                                                  |                                            |                                             |                         |                                            |                                             |                         |
| <sup>2</sup> Proportion calculated as the total events in first outcome divided by the total events in second outcome. |                                                                                  |                                            |                                             |                         |                                            |                                             |                         |
| <sup>3</sup> Samet et al. <sup>21</sup>                                                                                |                                                                                  |                                            |                                             |                         |                                            |                                             |                         |

**eTable 5. Adjusted Rate of Each Outcome Within Trial Groups and Adjusted Relative Rate of Each Outcome Between Intervention to Control Communities During the Evaluation Period Using the Per-Protocol Population<sup>1</sup>**

| Outcome                                                                                                                                                                                                                                                                                                                                                                                                                                                   | Intervention Communities            | Control Communities                 | Adjusted Rate Ratio (95% CI) <sup>3</sup> | P-value |
|-----------------------------------------------------------------------------------------------------------------------------------------------------------------------------------------------------------------------------------------------------------------------------------------------------------------------------------------------------------------------------------------------------------------------------------------------------------|-------------------------------------|-------------------------------------|-------------------------------------------|---------|
|                                                                                                                                                                                                                                                                                                                                                                                                                                                           | Adjusted Rate (95% CI) <sup>2</sup> | Adjusted Rate (95% CI) <sup>2</sup> |                                           |         |
| Drug Overdose Deaths <sup>4</sup>                                                                                                                                                                                                                                                                                                                                                                                                                         | 56.21 (50.20, 62.94)                | 61.00 (54.14, 68.72)                | 0.92 (0.79, 1.08)                         | 0.294   |
| Overdose Deaths Involving any Opioid and any Psychostimulant (Other than Cocaine) <sup>5</sup>                                                                                                                                                                                                                                                                                                                                                            | 6.60 (5.06, 8.60)                   | 10.54 (7.75, 14.33)                 | 0.63 (0.43, 0.90)                         | 0.013   |
| Overdose Deaths Involving any Opioid and Cocaine <sup>6</sup>                                                                                                                                                                                                                                                                                                                                                                                             | 10.40 (8.38, 12.92)                 | 10.97 (8.31, 14.50)                 | 0.95 (0.69, 1.30)                         | 0.739   |
| Overdose Deaths Involving any Opioid and any Benzodiazepine <sup>7</sup>                                                                                                                                                                                                                                                                                                                                                                                  | 6.62 (5.27, 8.31)                   | 6.58 (4.94, 8.77)                   | 1.01 (0.74, 1.36)                         | 0.971   |
| <sup>1</sup> Results obtained from a negative binomial model adjusting for research site (KY, MA, NY, OH), urban/rural classification, baseline opioid overdose death rate, and baseline rate of the outcome. The natural log of the observed community population size of individuals 18 years of age or older measured from the 2020 Bridged-Race Population Estimates or the 2017-2021 American Community Survey 5-Year Averages is used as an offset. |                                     |                                     |                                           |         |
| <sup>2</sup> Model estimated event rate expressed as per 100,000 residents aged 18 and older.                                                                                                                                                                                                                                                                                                                                                             |                                     |                                     |                                           |         |
| <sup>3</sup> Adjusted relative rate of outcome during the evaluation period between Intervention and Control communities.                                                                                                                                                                                                                                                                                                                                 |                                     |                                     |                                           |         |
| <sup>4</sup> Estimated dispersion parameter, k: 0.0439; 95%CI: (0.0217, 0.0888)                                                                                                                                                                                                                                                                                                                                                                           |                                     |                                     |                                           |         |
| <sup>5</sup> Estimated dispersion parameter, k: 0.2136; 95%CI: (0.1094, 0.4170)                                                                                                                                                                                                                                                                                                                                                                           |                                     |                                     |                                           |         |
| <sup>6</sup> Estimated dispersion parameter, k: 0.1454; 95%CI: (0.0762, 0.2774)                                                                                                                                                                                                                                                                                                                                                                           |                                     |                                     |                                           |         |
| <sup>7</sup> Estimated dispersion parameter, k: 0.0847; 95%CI: (0.0261, 0.2747)                                                                                                                                                                                                                                                                                                                                                                           |                                     |                                     |                                           |         |

eTable 6. Sensitivity Analyses

| Sensitivity Post-Hoc                                                                       | Outcome                                                                                                        | Distribution      | Weight/offset                  | Covariates                                                                                                        | Subgroup | Adjusted rate in Intervention Communities | Adjusted rate in Control Communities | Adjusted rate ratio between Intervention and Control Communities | P-Value |
|--------------------------------------------------------------------------------------------|----------------------------------------------------------------------------------------------------------------|-------------------|--------------------------------|-------------------------------------------------------------------------------------------------------------------|----------|-------------------------------------------|--------------------------------------|------------------------------------------------------------------|---------|
| <b>Primary Outcome</b>                                                                     |                                                                                                                |                   |                                |                                                                                                                   |          |                                           |                                      |                                                                  |         |
| <b>Assess Impact of Community Size</b>                                                     | Drug overdose deaths during the comparison period                                                              | Poisson           | Offset: Log of population size | Trial group, research site, urban/rural, baseline rate of M1, baseline rate of outcome                            | Overall  | 55.14 (49.39, 61.56)                      | 64.93 (57.87, 72.87)                 | 0.85 (0.72, 1.00)                                                | 0.045   |
| <b>Assess Impact of Assuming Common Effect of Urban/Rural Status Across Research Sites</b> | Drug overdose deaths during the comparison period                                                              | Negative binomial | Offset: Log of population size | Trial group, research site, urban/rural, baseline rate of M1, baseline rate of outcome, research site*urban/rural | Overall  | 55.15 (49.13, 61.90)                      | 62.21 (54.90, 70.48)                 | 0.89 (0.76, 1.04)                                                | 0.127   |
| <b>Secondary Outcomes</b>                                                                  |                                                                                                                |                   |                                |                                                                                                                   |          |                                           |                                      |                                                                  |         |
| <b>Assess Impact of Community Size</b>                                                     | Overdose deaths involving any opioid and any psychostimulant (other than cocaine) during the comparison period | Poisson           | Offset: Log of population size | Trial group, research site, urban/rural, baseline rate of M1, baseline rate of outcome                            | Overall  | 7.19 (5.76, 8.98)                         | 10.57 (8.14, 13.73)                  | 0.68 (0.55, 0.85)                                                | <0.001  |
|                                                                                            |                                                                                                                |                   |                                |                                                                                                                   |          |                                           |                                      |                                                                  |         |
| <b>Assess Impact of Community Size</b>                                                     | Overdose deaths involving any opioid and cocaine during the comparison period                                  | Poisson           | Offset: Log of population size | Trial group, research site, urban/rural, baseline rate of M1, baseline rate of outcome                            | Overall  | 11.01 (8.51, 14.23)                       | 12.42 (9.46, 16.31)                  | 0.89 (0.63, 1.25)                                                | 0.482   |

|                                                                                                                          |                                                                                          |                   |                                |                                                                                        |         |                                                                                                         |                                                                                                    |                                                                    |                                 |
|--------------------------------------------------------------------------------------------------------------------------|------------------------------------------------------------------------------------------|-------------------|--------------------------------|----------------------------------------------------------------------------------------|---------|---------------------------------------------------------------------------------------------------------|----------------------------------------------------------------------------------------------------|--------------------------------------------------------------------|---------------------------------|
| <b>Assess Impact of Community Size</b>                                                                                   | Overdose deaths involving any opioid and any benzodiazepine during the comparison period | Poisson           | Offset: Log of population size | Trial group, research site, urban/rural, baseline rate of M1, baseline rate of outcome | Overall | 6.56 (5.17, 8.33)                                                                                       | 7.00 (5.37, 9.14)                                                                                  | 0.94 (0.72, 1.22)                                                  | 0.618                           |
| <b>Post-Hoc</b>                                                                                                          |                                                                                          |                   |                                |                                                                                        |         | <b>Adjusted rate ratio between comparison and baseline periods in Intervention Communities (95% CI)</b> | <b>Adjusted rate ratio between comparison and baseline periods in Control Communities (95% CI)</b> | <b>Ratio between Intervention and Control Communities (95% CI)</b> | <b>P-value from interaction</b> |
| <b>Comparing the Change in Drug Overdose Death Rate Between the Baseline and Comparison Periods Between Trial Groups</b> | Drug overdose deaths                                                                     | Negative binomial | Offset: Log of population size | Trial group, research site, urban/rural, time, trial group*time                        | Overall | 1.30 (1.15, 1.47)                                                                                       | 1.40 (1.26, 1.57)                                                                                  | 0.93 (0.79, 1.09)                                                  | 0.372                           |
| <b>Comparing the Change in Drug Overdose Death Rate Between the Baseline and Comparison Periods Between Trial Groups</b> | Drug overdose deaths                                                                     | Poisson           | Offset: Log of population size | Trial group, research site, urban/rural, time, trial group*time                        | Overall | 1.24 (1.08, 1.42)                                                                                       | 1.46 (1.33, 1.61)                                                                                  | 0.85 (0.72, 1.00)                                                  | 0.046                           |
