# Supplementary material for: Communities That HEAL Intervention and Mortality Including Polysubstance Overdose Deaths: A Randomized Clinical Trial
Source: PubMed Central journal article supplement (PMC11581668; doi:10.1001/jamanetworkopen.2024.40006), 2024-10-21
Supplement: jamanetwopen-e2440006-s003.pdf [file jamanetwopen-e2440006-s003.pdf]

## Data Sharing Statement

Freisthler. Communities That HEAL Intervention and Mortality Including Polysubstance Overdose Deaths. *JAMA Netw Open*. Published October 21, 2024.

doi:10.1001/jamanetworkopen.2024.40006

### Data

**Additional Information:** ClinicalTrials.gov Identifier: NCT04111939

**Data available:** Yes

**Data types:** Deidentified participant data, Data dictionary

**How to access data:** University of Michigan's Inter-university Consortium for Political and Social Research (ICPSR) will archive HCS data. ICPSR home page:

<https://www.icpsr.umich.edu/web/pages/>

**When available:** beginning date: 03-31-2025

### Supporting Documents

**Document types:** None

### Additional Information

**Who can access the data:** Researchers whose proposed use of the data has been approved

**Types of analyses:** For any purpose

**Mechanisms of data availability:** With a signed data access agreement
